# Supplementary material
Source: PubMed Central journal article supplement (PMC3838230)
Supplement: JVI.01247-13_zjv999098376so1.pdf [file JVI.01247-13_zjv999098376so1.pdf]

## Supplemental Material

**Supplementary Table S1.** Detailed binding kinetics of Fabs and mAbs to JRFL gp140-F

|           | $K_D$ (M)                    | on-rate (1/Ms)                            | off-rate (1/s)                                |
|-----------|------------------------------|-------------------------------------------|-----------------------------------------------|
| VRC01 Fab | $1.05 \times 10^{-8}$        | $1.85 \times 10^4 \pm 5.38 \times 10^1^*$ | $1.95 \times 10^{-4} \pm 5.53 \times 10^{-7}$ |
| 17b Fab   | <i>nd</i>                    | <i>nd</i>                                 | <i>nd</i>                                     |
| b12 Fab   | $1.59 \times 10^{-9}$        | $3.62 \times 10^5 \pm 5.51 \times 10^3$   | $5.74 \times 10^{-4} \pm 2.63 \times 10^{-6}$ |
| F105 Fab  | $4.63 \times 10^{-9}$        | $2.30 \times 10^5 \pm 1.79 \times 10^3$   | $1.07 \times 10^{-3} \pm 2.66 \times 10^{-6}$ |
| b6 Fab    | $<1.00 \times 10^{-12}^{**}$ | $8.25 \times 10^4 \pm 6.00 \times 10^2$   | $<1.00 \times 10^{-7}^{**}$                   |
| VRC03 IgG | $5.87 \times 10^{-8}$        | $5.31 \times 10^3 \pm 1.83 \times 10^1$   | $3.12 \times 10^{-4} \pm 1.47 \times 10^{-6}$ |
| PGV04 IgG | $<1.00 \times 10^{-12}^{**}$ | $5.65 \times 10^3 \pm 8.08 \times 10^2$   | $<1.00 \times 10^{-7}^{**}$                   |
| 17b IgG   | <i>nd</i>                    | <i>nd</i>                                 | <i>nd</i>                                     |

\*Standard error values are shown for on-rates and off-rates

\*\* The kinetic constants of  $K_D$  and off-rate cannot be determined accurately by Octet because of very slow dissociation of the b6 Fab or PGV04 IgG from the trimer.

“*nd*” = no detectable binding

## Supplementary Figure S1

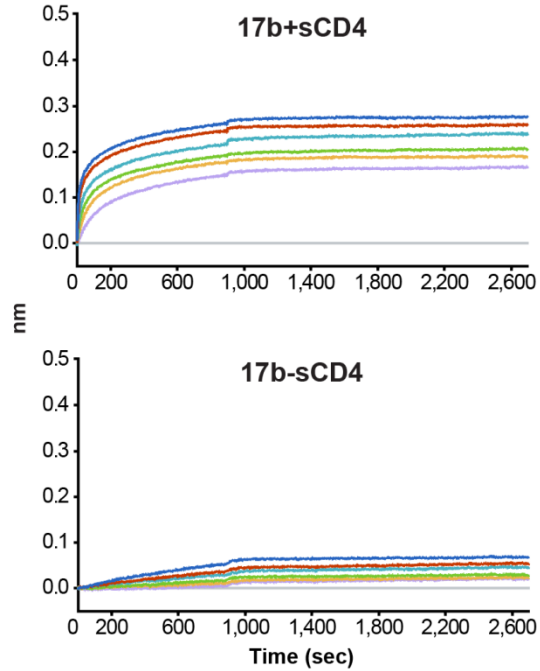

Fig S1. 17b binding to JRFL gp140-F trimmers with or without soluble CD4 pre-incubation. JRFL gp140-F trimmers were immobilized on Amine Reactive biosensors and then dipped into 50  $\mu\text{g/ml}$  sCD4 (17b+sCD4) or buffer without sCD4 (17b-sCD4) for 30 min. The association and dissociation with 17b IgG were performed as that described in the Materials and Methods section.

Supplementary Figure S2

Overall gp41 titers to rpg41 by ELISA

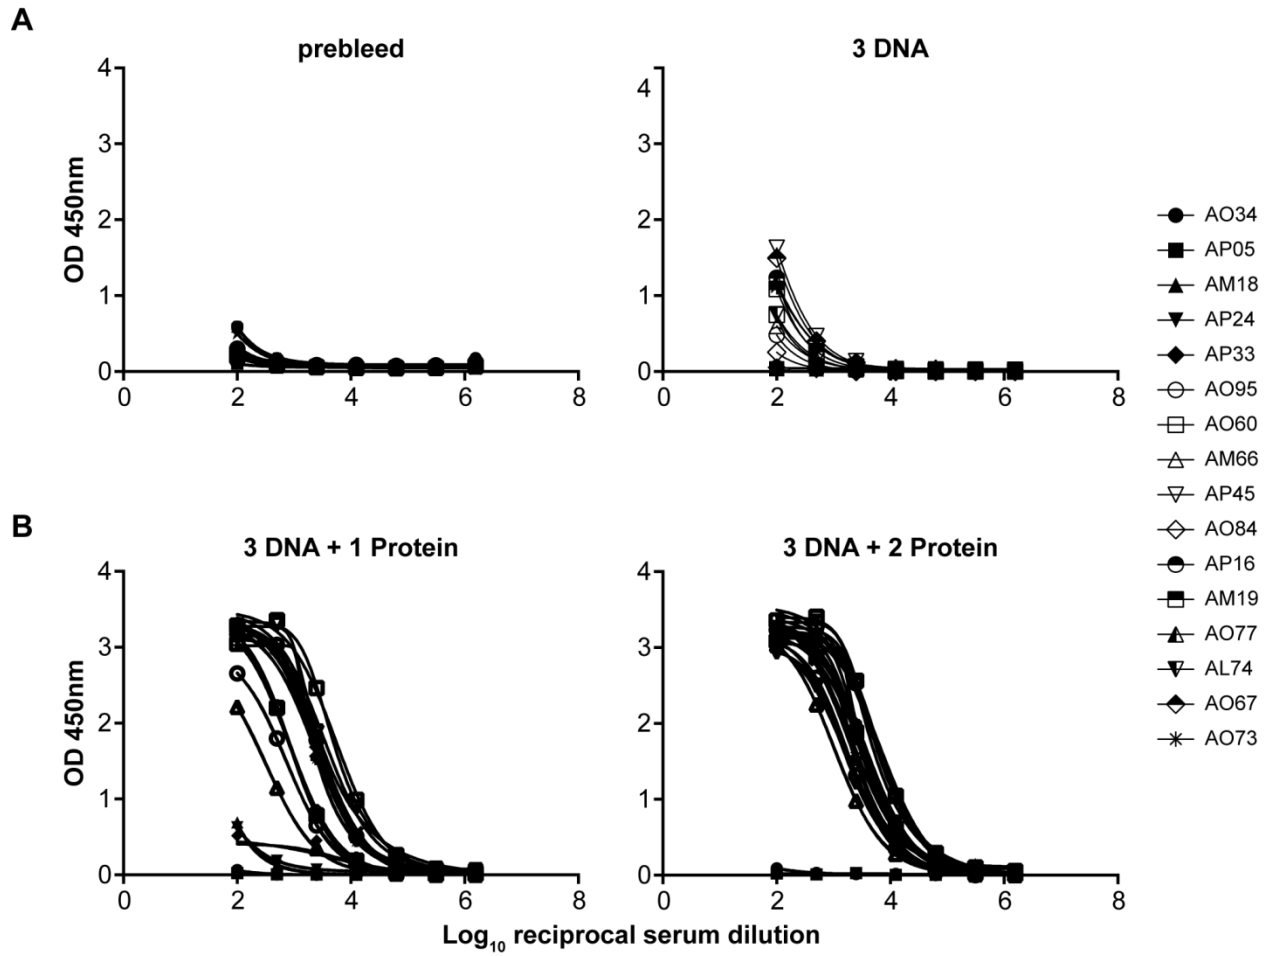

**Fig S2.** ELISA binding curves for the total gp41 response in the sera of JRFL Env-immunized NHPs. A. Left, the background binding curves in the pre-bleed sera; right, 3 times DNA. B. Left, 3 DNA and 2 protein; right, 3 DNA and 2 protein.

### Supplementary Figure S3

#### Comparison of gp140 to gp41 Antibody Responses

Median EC<sub>50</sub> values of the total gp140 and gp41 titers after 3 DNA, 3 DNA + 1 protein and 3 DNA + 2 protein. (±) indicates the standard deviation associated with the median ED<sub>50</sub> values.

|                                 | 3 DNA      | 3 DNA + 1 Protein | 3 DNA + 2 Protein |
|---------------------------------|------------|-------------------|-------------------|
| Response to gp140               | 413.1±303  | 8540±2970         | 12995±4339        |
| Response to gp41                | 38.14±12.7 | 2293±1113.4       | 3323±1656         |
| Ratio of responses (gp140/gp41) | 10.82      | 3.72              | 3.91              |

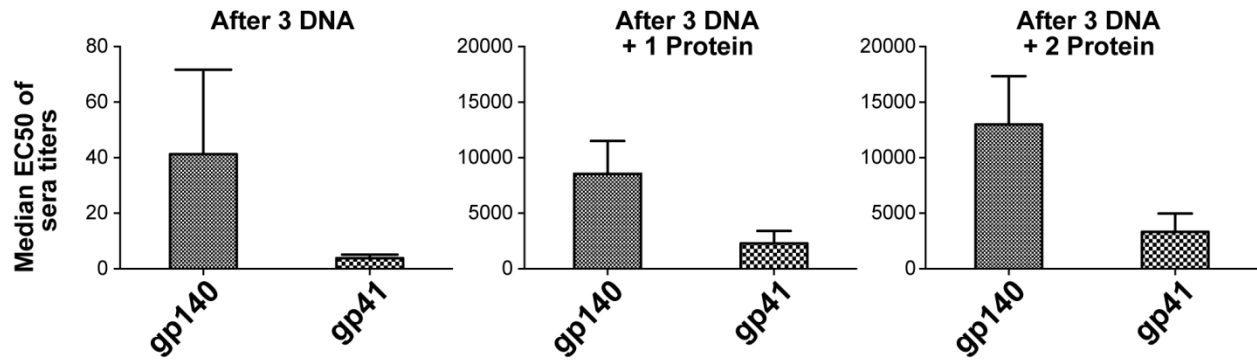

**Fig S3.** Comparison of the total gp140 and gp41 response after 3 DNA, 3 DNA and 1 protein, and 3 DNA and 2 protein inoculations into NHPs as indicated.

Supplementary Figure S4

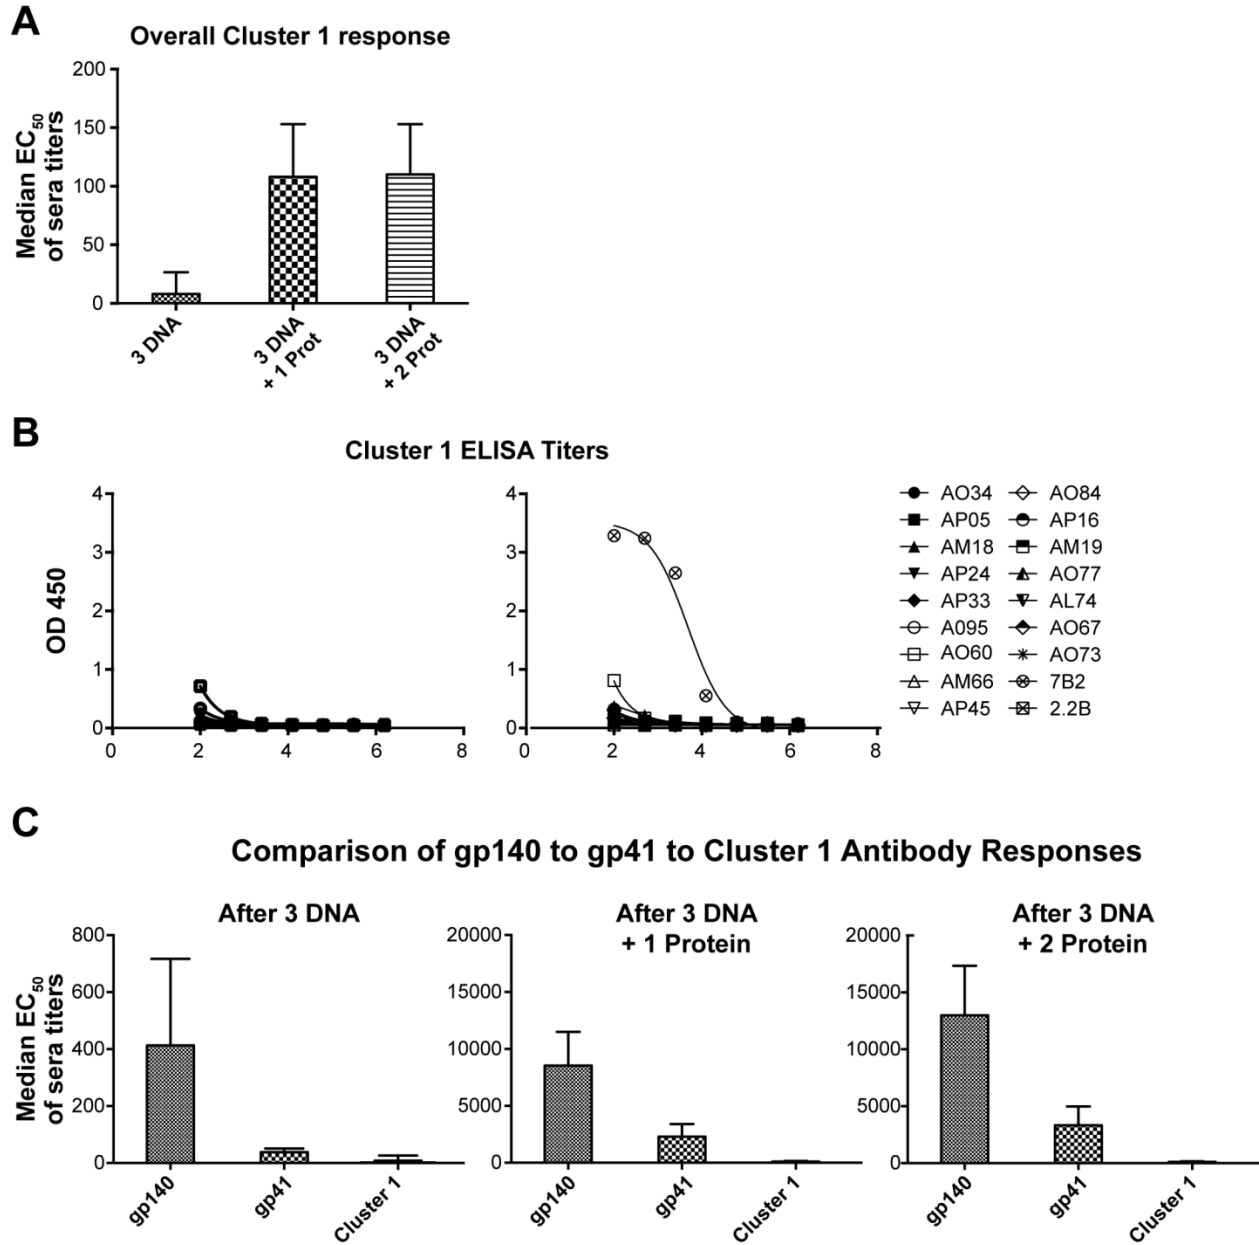

**Fig S4.** Cluster I IgG responses in Env-immunized NHPs. A. The median ED<sub>50</sub> values of total cluster I responses after 3 DNA, 3 DNA + 1 protein and 3 DNA + 2 protein. B. Low ELISA titers to cluster I after 3 DNA + 1 protein and 3 DNA and 2 protein boost. C. Comparison of the total gp140 and gp41 and cluster I responses after 3 DNA immunization, 3 DNA and 1 protein

and 3 DNA and 2 protein. The error bars represent the standard deviations associated with the median EC<sub>50</sub> values.

Supplementary Figure S5

TZM-bl Assay: JRFL Trimer-elicited Neutralizing Titers ID<sub>50</sub>

|                               |                | Clade B virus |       |       |       |        |        |     |       |      |      |       | Clade C virus |              |     |
|-------------------------------|----------------|---------------|-------|-------|-------|--------|--------|-----|-------|------|------|-------|---------------|--------------|-----|
|                               |                | Tier 1        |       |       |       |        | Tier 2 |     |       |      |      |       |               |              |     |
| Inoculation/<br>Bleed         | Animal         | MN            | HXB2  | SF162 | BaL   | SS1196 | JRFL   | YU2 | SC422 | 6535 | THRO | MW965 | ZM109         | JRFL<br>Δ301 |     |
| Controls                      | PBS            | AO34          | <5    | <5    | <5    | <5     | 19     | 8   | <5    | <5   | <5   | 18    | <5            | 6            | <5  |
|                               | PBS            |               | 40    | <5    | <5    | <5     | 21     | 20  | 24    | 19   | <5   | 19    | <5            | 20           | 18  |
|                               | PBS            |               | <5    | <5    | <5    | <5     | 17     | 17  | 13    | 11   | <5   | 16    | <5            | 11           | <5  |
|                               | PBS            | AP05          | <5    | <5    | <5    | <5     | 27     | 16  | 11    | 14   | <5   | 14    | <5            | 15           | <5  |
|                               | PBS            |               | <5    | <5    | <5    | <5     | 42     | 22  | 19    | 22   | <5   | 24    | <5            | 20           | 5   |
|                               | PBS            |               | <5    | <5    | <5    | <5     | 38     | 27  | 15    | 26   | <5   | 25    | <5            | 16           | <5  |
| Protein Trimers               | PBS            | AM18          | <5    | <5    | <5    | <5     | 16     | 7   | 5     | <5   | <5   | 17    | <5            | <5           | <5  |
|                               | 1 Protein      |               | <5    | <5    | <5    | 14     | 26     | 20  | 22    | 20   | <5   | 20    | <5            | 20           | 13  |
|                               | 2 Protein      |               | 32918 | 65    | 2677  | 282    | 227    | 28  | 12    | 31   | 7    | 22    | 1592          | 23           | 213 |
|                               | PBS            | AP24          | <5    | <5    | <5    | <5     | 15     | 7   | 7     | 6    | <5   | 9     | <5            | 5            | <5  |
|                               | 1 Protein      |               | <5    | <5    | <5    | <5     | 31     | 25  | 27    | 25   | <5   | 25    | <5            | 24           | 16  |
|                               | 2 Protein      |               | 24690 | 382   | 1413  | 124    | 99     | 37  | 17    | 24   | 9    | 23    | 1935          | 20           | 137 |
| Non-Codon optimized DNA Prime | PBS            | AP33          | <5    | <5    | <5    | <5     | 20     | 6   | 9     | 29   | 20   | 20    | <5            | 19           | 19  |
|                               | 1 Protein      |               | <5    | <5    | <5    | <5     | 24     | 20  | 21    | 16   | <5   | 20    | <5            | 18           | 13  |
|                               | 2 Protein      |               | 16614 | 121   | 1073  | 102    | 70     | 16  | 8     | 22   | <5   | 22    | 629           | 14           | 71  |
|                               | 3XDNA          | AO95          | <5    | <5    | <5    | <5     | <5     | 6   | 7     | <5   | <5   | <5    | <5            | <5           | <5  |
|                               | 3XDNA+1Protein |               | 6101  | 10    | 62    | 19     | 51     | 14  | 17    | 25   | 5    | 22    | 84            | 21           | 79  |
|                               | 3XDNA+2Protein |               | 34690 | 434   | 781   | 39     | 96     | 14  | 10    | 10   | <5   | 23    | 3564          | 26           | 97  |
| Codon-optimized DNA Prime     | 3XDNA          | AO60          | 32    | <5    | <5    | <5     | 18     | 11  | 17    | 17   | <5   | 12    | <5            | 15           | 8   |
|                               | 3XDNA+1Protein |               | 8976  | 33    | 577   | 52     | 69     | 23  | 5     | 19   | 11   | 20    | 835           | 20           | 144 |
|                               | 3XDNA+2Protein |               | 34578 | 75    | 1892  | 59     | 75     | 64  | 5     | 20   | 10   | 16    | 1383          | 16           | 290 |
|                               | 3XDNA          | AM66          | 78    | <5    | <5    | <5     | 16     | <5  | <5    | 10   | <5   | 14    | <5            | 11           | <5  |
|                               | 3XDNA+1Protein |               | 7627  | 12    | 329   | 22     | 65     | 23  | 22    | 23   | 8    | 23    | 121           | 19           | 67  |
|                               | 3XDNA+2Protein |               | 32311 | 116   | 7382  | 173    | 146    | 35  | 14    | 25   | 19   | 25    | 7658          | 19           | 168 |
| Protein Trimers               | 3XDNA          | AP45          | <5    | <5    | <5    | <5     | 18     | 10  | 19    | 15   | <5   | 10    | <5            | <5           | <5  |
|                               | 3XDNA+1Protein |               | 3465  | 14    | 121   | 15     | 48     | 24  | 33    | 37   | <5   | 27    | 34            | 22           | 41  |
|                               | 3XDNA+2Protein |               | 32935 | 381   | 1507  | 66     | 104    | 27  | 13    | 65   | 42   | 36    | 1256          | 30           | 145 |
|                               | 3XDNA          | AO84          | 75    | <5    | <5    | <5     | 15     | 8   | 18    | 12   | <5   | 9     | <5            | 6            | <5  |
|                               | 3XDNA+1Protein |               | 10931 | 17    | 441   | 64     | 66     | 33  | 38    | 30   | <5   | 25    | 471           | 30           | 102 |
|                               | 3XDNA+2Protein |               | 24928 | 659   | 4398  | 476    | 221    | 35  | 17    | 129  | <5   | 30    | 4759          | 53           | 215 |
| Non-Codon optimized DNA Prime | 3XDNA          | AP16          | 16    | <5    | 5     | <5     | 20     | 11  | 25    | 20   | <5   | 14    | 8             | 10           | 14  |
|                               | 3XDNA+1Protein |               | 6566  | 20    | 786   | 72     | 125    | 39  | 40    | 37   | 5    | 42    | 532           | 22           | 165 |
|                               | 3XDNA+2Protein |               | 33019 | 288   | 6123  | 295    | 190    | 139 | 21    | 12   | 33   | 33    | 4209          | 53           | 391 |
|                               | 3XDNA          | AM19          | 230   | <5    | 5     | <5     | 28     | 10  | 18    | 21   | <5   | 19    | <5            | 13           | 9   |
|                               | 3XDNA+1Protein |               | 3509  | 129   | 553   | 37     | 58     | 29  | 42    | 31   | 9    | 31    | 557           | 28           | 81  |
|                               | 3XDNA+2Protein |               | 19805 | 923   | 6756  | 154    | 83     | 21  | 14    | 34   | 33   | 24    | 8121          | 38           | 163 |
| Codon-optimized DNA Prime     | 3XDNA          | AO77          | 1390  | <5    | 28    | <5     | 21     | 17  | 14    | 18   | <5   | 19    | 15            | 9            | 17  |
|                               | 3XDNA+1Protein |               | 8146  | 162   | 147   | 31     | 73     | 21  | 41    | 21   | <5   | 32    | 673           | 25           | 181 |
|                               | 3XDNA+2Protein |               | 42282 | 1605  | 6073  | 260    | 157    | 26  | 19    | 62   | 15   | 27    | 15919         | 20           | 541 |
|                               | 3XDNA          | AL74          | 3156  | <5    | 27    | 7      | 43     | 13  | 15    | 28   | <5   | 16    | 32            | 13           | 16  |
|                               | 3XDNA+1Protein |               | 9926  | 115   | 1135  | 82     | 96     | 44  | 40    | 35   | 25   | 42    | 1003          | 43           | 207 |
|                               | 3XDNA+2Protein |               | 27049 | 2361  | 6758  | 368    | 297    | 55  | 13    | 75   | 28   | 32    | 6024          | 74           | 428 |
| Protein Trimers               | 3XDNA          | AO67          | 463   | <5    | 5     | <5     | 22     | 1   | 17    | 17   | <5   | 19    | 7             | 1            | 17  |
|                               | 3XDNA+1Protein |               | 5486  | 59    | 402   | 36     | 74     | 22  | 28    | 24   | 5    | 32    | 444           | 21           | 86  |
|                               | 3XDNA+2Protein |               | 33110 | 697   | 3993  | 135    | 146    | 29  | 1     | 244  | 88   | 40    | 4566          | 25           | 264 |
|                               | 3XDNA          | AO73          | 270   | <5    | 13    | <5     | 35     | 15  | 18    | 18   | <5   | 18    | 20            | 12           | 10  |
|                               | 3XDNA+1Protein |               | 3103  | 27    | 751   | 62     | 65     | 30  | 30    | 20   | 11   | 25    | 1352          | 30           | 73  |
|                               | 3XDNA+2Protein |               | 49704 | 1636  | 19890 | 486    | 272    | 38  | 15    | 63   | 25   | 27    | 91920         | 30           | 437 |

ID50 20-99 ID50 100-999 ID50 >1000

**Fig S5.** Shown are the ID<sub>50</sub> neutralization values in the TZM-bl assay elicited by the selected regimens of JRFL trimers inoculated into NHPs. The first two animals (A034, AP05) are controls that received 5 inoculations of PBS. The next three animals (AM18, AP21 and AP33) received three PBS “primers” in lieu of Env plasmid DNA and were inoculated once (1 Protein) and twice (2 Protein) with JRFL gp140-F trimer protein in adjuvant. The next 6 animals were primed three times with non-codon optimized cell-surface JRFL Env plasmid DNA and pCTat at 1:1 ratio of the relative concentrations (A095, A060 and AM66) or non-codon optimized JRFL Env plasmid to pCTat at a 1:20 ratio (AP45, AO84 and AP16) followed by 1 Protein and 2

Protein boosts of JRFL gp140-F trimers in adjuvant as shown. Then next three animals (AM19, AO77 and AL74) were primed with 3 inoculations of codon-optimized JRFL cell-surface plasmid DNA followed by 1 Protein and 2 Protein boosts of JRFL gp140-F trimers in adjuvant. The last two animals (AO67 and AO73) were primed 3 times with codon-optimized DNA expressing soluble gp140-F trimers followed by Protein 1 and Protein 2 boosts of JRFL gp140-F trimers in adjuvant as shown.



Supplementary Figure S6

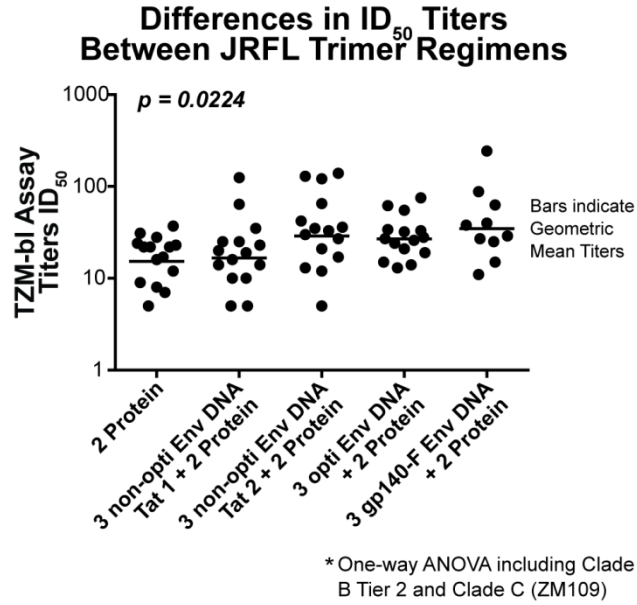

**Fig S6.** Statistical analysis of the TzM-bl ID<sub>50</sub> neutralization values elicited by the 5 different inoculation regimens described in Fig S4 and the Results. The one-way ANOVA analysis revealed a statistically significant difference between the 5 regimens.

Supplementary Figure S7

A3R5 Assay: JRFL Trimer-elicited Neutralizing Titers ID<sub>50</sub>

|                     |      | Inoculation/<br>Bleed | Clade B viruses |      |      |      |      |      | Clade C viruses |       |         |                 |        |     |
|---------------------|------|-----------------------|-----------------|------|------|------|------|------|-----------------|-------|---------|-----------------|--------|-----|
|                     |      |                       | Animal          | SC22 | RHPA | CH58 | THRO | WITO | 1051            | CAP45 | CEe1086 | Du151           | Ce2010 |     |
| Controls            |      | PBS                   | AO34            | 22   | <20  | 31   | 22   | 23   | 36              | <20   | 21      | 37              | 34     |     |
|                     |      | PBS                   |                 | <20  | <20  | 27   | <20  | <20  | 25              | <20   | <20     | <20             | <20    |     |
|                     |      | PBS                   |                 | <20  | <20  | 28   | <20  | <20  | <20             | 37    | <20     | <20             | 21     | <20 |
|                     |      | PBS                   | AP05            | <20  | <20  | 29   | <20  | <20  | <20             | 30    | <20     | <20             | 32     | 28  |
|                     |      | PBS                   |                 | 23   | <20  | 28   | 21   | <20  | <20             | 34    | <20     | <20             | 42     | 38  |
|                     |      | PBS                   |                 | <20  | <20  | 34   | 23   | <20  | <20             | 32    | <20     | 21              | 28     | <20 |
| Protein Trimers     |      | PBS                   | AM18            | 23   | <20  | <20  | <20  | <20  | 26              | <20   | <20     | <20             | <20    |     |
|                     |      | 1 Protein             |                 | 31   | <20  | 29   | 80   | <20  | 38              | 28    | 30      | 23              | NS     |     |
|                     |      | 2 Protein             |                 | 329  | 1980 | 62   | 162  | 36   | 50              | <20   | 29      | 40              | 29     |     |
|                     |      | PBS                   | AP24            | <20  | <20  | <20  | <20  | <20  | 24              | <20   | <20     | 26              | <20    |     |
|                     |      | 1 Protein             |                 | 24   | <20  | 28   | 24   | 23   | 32              | <20   | <20     | NT <sup>†</sup> | NT     |     |
|                     |      | 2 Protein             |                 | 415  | 1258 | 104  | 145  | 45   | 93              | 372   | 91      | 61              | 102    |     |
| Non-Codon optimized |      | PBS                   | AP33            | <20  | <20  | 20   | 23   | <20  | 31              | <20   | <20     | 50              | 29     |     |
|                     |      | 1 Protein             |                 | <20  | <20  | 20   | <20  | <20  | 23              | <20   | <20     | 35              | NT     |     |
|                     |      | 2 Protein             |                 | 399  | 1105 | 121  | 143  | 34   | 67              | 84    | 183     | 83              | 57     |     |
|                     |      | 3XDNA                 | AO95            | <20  | <20  | 22   | 21   | 21   | 26              | <20   | <20     | 23              | <20    |     |
|                     |      | 3XDNA+1Protein        |                 | 163  | 203  | 50   | 69   | 55   | 51              | <20   | 24      | 29              | 33     |     |
|                     |      | 3XDNA+2Protein        |                 | 521  | 2124 | 101  | 140  | 105  | 99              | 52    | 67      | 54              | 47     |     |
| Codon-optimized     |      | 3XDNA                 | AO60            | <20  | <20  | 27   | 35   | 24   | 23              | <20   | 24      | 32              | 23     |     |
|                     |      | 3XDNA+1Protein        |                 | 584  | 1959 | 107  | 332  | 92   | 63              | 380   | 156     | 62              | 77     |     |
|                     |      | 3XDNA+2Protein        |                 | 715  | 1845 | 75   | 135  | 73   | 58              | 234   | 78      | 46              | 41     |     |
|                     |      | 3XDNA                 | AM66            | <20  | <20  | 29   | 23   | <20  | 34              | <20   | <20     | 27              | 21     |     |
|                     |      | 3XDNA+1Protein        |                 | 159  | 430  | 49   | 76   | 31   | 49              | <20   | 77      | 30              | 53     |     |
|                     |      | 3XDNA+2Protein        |                 | 503  | 2043 | 69   | 167  | 48   | 86              | 50    | 91      | 64              | 85     |     |
|                     |      | 3XDNA                 | AP45            | <20  | <20  | 28   | 20   | <20  | 22              | <20   | <20     | 22              | <20    |     |
|                     |      | 3XDNA+1Protein        |                 | 302  | 693  | 82   | 103  | 28   | 46              | 195   | 69      | 63              | 57     |     |
|                     |      | 3XDNA+2Protein        |                 | 314  | 1588 | 86   | 124  | 37   | 33              | 398   | 88      | 86              | 90     |     |
|                     |      | 3XDNA                 | AO84            | <20  | <20  | <20  | <20  | 21   | <20             | <20   | <20     | <20             | <20    |     |
|                     |      | 3XDNA+1Protein        |                 | 64   | 543  | 31   | 55   | 36   | <20             | <20   | 27      | <20             | 26     |     |
|                     |      | 3XDNA+2Protein        |                 | 450  | 1957 | 77   | 167  | 65   | 78              | 131   | 47      | 31              | 32     |     |
| 3XDNA               | AP16 | <20                   | <20             | 26   | 23   | <20  | 23   | <20  | 24              | 23    | 27      |                 |        |     |
| 3XDNA+1Protein      |      | 346                   | 2737            | 97   | 184  | 41   | 65   | <20  | 37              | 30    | 28      |                 |        |     |
| 3XDNA+2Protein      |      | 775                   | 5228            | 121  | 180  | 90   | 43   | 219  | 51              | 36    | 27      |                 |        |     |
| Codon-optimized     |      | 3XDNA                 | AM19            | <20  | <20  | 22   | <20  | <20  | <20             | <20   | <20     | <20             |        |     |
|                     |      | 3XDNA+1Protein        |                 | 881  | 1752 | 84   | 158  | 30   | 33              | <20   | 46      | 47              | 32     |     |
|                     |      | 3XDNA+2Protein        |                 | 1289 | 2865 | 94   | 114  | <20  | 41              | 144   | 48      | 51              | 31     |     |
|                     |      | 3XDNA                 | AO77            | <20  | <20  | 23   | <20  | <20  | <20             | <20   | <20     | <20             | <20    |     |
|                     |      | 3XDNA+1Protein        |                 | 390  | 1217 | 43   | 37   | <20  | 56              | <20   | <20     | <20             | <20    |     |
|                     |      | 3XDNA+2Protein        |                 | 2075 | 4335 | 80   | 63   | <20  | 50              | <20   | 21      | 29              | <20    |     |
|                     |      | 3XDNA                 | AL74            | <20  | <20  | 24   | <20  | <20  | <20             | <20   | <20     | NT              | NT     |     |
|                     |      | 3XDNA+1Protein        |                 | 295  | 1839 | 81   | 135  | 66   | 44              | 61    | 70      | NT              | NT     |     |
|                     |      | 3XDNA+2Protein        |                 | 1297 | 3152 | 148  | 135  | ns   | ns              | 285   | 99      | NT              | NT     |     |
|                     |      | 3XDNA                 | AO67            | <20  | <20  | 21   | <20  | <20  | <20             | <20   | <20     | <20             | <20    |     |
|                     |      | 3XDNA+1Protein        |                 | 429  | 690  | 59   | 78   | 52   | 57              | <20   | 31      | 32              | 26     |     |
|                     |      | 3XDNA+2Protein        |                 | 2450 | 1967 | 195  | 286  | 55   | 72              | 251   | 94      | 50              | 83     |     |
| 3XDNA               | AO73 | <20                   | <20             | 27   | <20  | <20  | <20  | <20  | <20             | <20   | <20     |                 |        |     |
| 3XDNA+1Protein      |      | 204                   | 465             | 60   | 67   | 39   | 30   | <20  | 29              | 28    | 25      |                 |        |     |
| 3XDNA+2Protein      |      | 889                   | 4541            | 90   | 149  | 89   | 32   | 36   | 57              | 39    | <20     |                 |        |     |

ID50   20-99 ID50   100-999 ID50   >1000

**Fig S7.** Shown are the ID<sub>50</sub> neutralization values in the A3R5 assay elicited by the selected regimens of JRFL trimers inoculated into NHPs. The first two animals (A034, AP05) are controls that received 5 inoculations of PBS. The next three animals (AM18, AP21 and AP33) received three PBS “primes” in lieu of Env plasmid DNA and were then inoculated once (1 Protein) and twice (2 Protein) with JRFL gp140-F trimer protein in adjuvant. The next 6 animals were primed three times with non-codon optimized cell-surface JRFL Env plasmid DNA and

pCTat at 1:1 ratio of the relative concentrations (A095, A060 and AM66) or non-codon optimized JRFL Env plasmid to pCTat at a 1:20 ratio (AP45, AO84 and AP16) followed by 1 Protein and 2 Protein boosts of JRFL gp140-F trimers in adjuvant as shown. Then next three animals (AM19, AO77 and AL74) were primed with 3 inoculations of codon-optimized JRFL cell-surface plasmid DNA followed by 1 Protein and 2 Protein boosts of JRFL gp140-F trimers in adjuvant. The last two animals (AO67 and AO73) were primed 3 times with codon-optimized DNA expressing soluble gp140-F trimers followed by Protein 1 and Protein 2 boosts of JRFL gp140-F trimers in adjuvant as shown.

## Supplementary Figure S8

### A3R5 Assay: YU2 gp140-F Trimer-elicited Tier 2 Titers Post 5 Protein

|                    | Inoculation/<br>Bleed       | Animal | Clade B virus |      |      | Clade C virus |       |    |
|--------------------|-----------------------------|--------|---------------|------|------|---------------|-------|----|
|                    |                             |        | SC22          | RHPA | CH58 | CEe1086       | Du151 |    |
| YU2 gp140-F Trimer | Pre                         | F123   | 23            | <20  | 29   | 33            | 31    |    |
|                    | 5 Protein                   |        | 60            | 163  | ND   | ND            | ND    |    |
|                    | Pre                         | F124   | 33            | <20  | 37   | 38            | 41    |    |
|                    | 5 Protein                   |        | 282           | 360  | 272  | 57            | 44    |    |
|                    | Pre                         | F125   | 49            | <20  | 31   | 29            | 35    |    |
|                    | 5 Protein                   |        | 381           | 483  | 127  | 58            | 42    |    |
|                    | Pre                         | F126   | 44            | 30   | 36   | 42            | 48    |    |
|                    | 5 Protein                   |        | 235           | 504  | 75   | 49            | 31    |    |
|                    | Pre                         | F127   | 24            | 38   | 39   | 33            | 34    |    |
|                    | 5 Protein                   |        | 243           | 872  | 344  | 60            | 43    |    |
|                    | Pre                         | F128   | <20           | 30   | 50   | 35            | 28    |    |
|                    | 5 Protein                   |        | 300           | 1233 | 337  | 100           | 63    |    |
|                    | Adjuvant<br>only<br>control |        | F129          | 43   | 33   | 39            | 34    | 32 |
|                    |                             |        | F130          | <20  | 36   | 38            | 28    | 31 |
|                    |                             | F131   | 35            | 31   | 42   | 33            | 26    |    |
|                    |                             | F132   | 46            | 23   | 34   | 39            | 36    |    |
|                    |                             | F133   | 39            | 34   | 45   | 37            | 44    |    |
|                    |                             | F134   | 51            | 39   | 38   | 37            | 34    |    |

ID50  20-99 ID50  100-999 ID50  >1000

Fig S8. Shown are the ID<sub>50</sub> values detected against five viruses in the A3R5 assay following 5 inoculations of the YU2 gp140-F trimeric proteins into NHPs (F123-F128). The last 6 animals are “adjuvant only” inoculated controls that were analyzed similarly.
